# Supplementary material
Source: PubMed Central journal article supplement (PMC3234710)
Supplement: supp_M111.260992_Supplementary_tables_and_figures_051011.pdf [file supp_M111.260992_Supplementary_tables_and_figures_051011.pdf]

**SUPPLEMENTARY DATA**

**Supplemental Table S1. Strains and plasmids**

| <b><i>Strains</i></b>     | <b><i>Description</i></b>                                                                                                                                                 |
|---------------------------|---------------------------------------------------------------------------------------------------------------------------------------------------------------------------|
| D282                      | <i>S. suis</i> serotype 2 strain isolated from pig brain, HA type P <sub>N</sub>                                                                                          |
| 628                       | <i>S. suis</i> serotype 2 strain isolated from human brain, HA type P <sub>N</sub>                                                                                        |
| P1/7                      | <i>S. suis</i> serotype 2 strain isolated from pig meningitis, HA type P <sub>N</sub> . Genomic sequence of the strain is available in Sanger Institute genomic database. |
| 166'                      | <i>S. suis</i> serotype 2 strain, virulent clinical strain isolated from pig, non hemagglutinating                                                                        |
| D282- <i>sadP</i>         | <i>sadP</i> ::pSF151, kan <sup>r</sup> , single cross-over mutant                                                                                                         |
| P1/7- <i>sadP</i>         | <i>sadP</i> ::pSF151, kan <sup>r</sup> , single cross-over mutant                                                                                                         |
| D282-981782               | 981782::pSF151, kan <sup>r</sup> , single cross-over mutant                                                                                                               |
| D282- <i>srtA</i>         | <i>srtA</i> ::pSF151, kan <sup>r</sup> , single cross-over mutant                                                                                                         |
| D282- $\Delta$ <i>dpr</i> | allelic replacement mutant, spc <sup>r</sup> , <sup>a</sup>                                                                                                               |
| D282-33                   | <i>dpr</i> ::pKUN19, spc <sup>r</sup> , single cross-over mutant <sup>b</sup>                                                                                             |
| BL21, Novablue(DE3)       | <i>E. coli</i> , expression strain, Novagen                                                                                                                               |
| DH5a                      | <i>E. coli</i> , cloning strain                                                                                                                                           |
| <b><i>Plasmids</i></b>    | <b><i>Description</i></b>                                                                                                                                                 |
| pSadP-KO                  | <i>sadP</i> ::pSF151, internal 433 bp PCR product (primers SadP-KO sense and SadP-KO antisense) of gene <i>sadP</i>                                                       |
| pSrtA-KO                  | cloned into vector pSF151<br><i>srtA</i> ::pSF151, internal 573 bp PCR product (primers SRTA-5'-KO and SRTA-3'-KO) of gene <i>srtA</i> cloned into vector pSF151          |
| pSadP                     | A 2.1 kb PCR product of <i>sadP</i> (primers SadP sense BamHI and SadP antisense XhoI) cloned into pET-28a                                                                |
| N(31-295) SadP            | A 1 kb PCR product of <i>sadP</i> (primers SadP sense BamHI and N(31-295) cloned into pET28a                                                                              |
| pET-28a                   | Novagen expression plasmid with polyhistidine and S-Tag                                                                                                                   |

<sup>a</sup> Pulliainen, A. T., Haataja, S., Kahkonen, S., and Finne, J. (2003) *J. Biol. Chem.* **278**, 7996-8005; <sup>b</sup> Pulliainen, A. T., Kauko, A., Haataja, S., Papageorgiou, A. C., and Finne, J. (2005) *Mol. Microbiol.* **57**, 1086-1100; <sup>c</sup> Tao, L., LeBlanc, D. J., and Ferretti, J. J. (1992) *Gene* **120**, 105-110

**Supplemental Table S2. Primers**

---

|                       |                                                                  |
|-----------------------|------------------------------------------------------------------|
| SadP-KOs              | TTTTTT <u>CTGCAGATTCAACGACAACGGTTA</u><br>(PstI underlined)      |
| SadP-KOa              | TTTTTT <u>GAATTC</u> ACTTTCCACTGAATCTGA<br>(EcoRI underlined)    |
| SadPs                 | GTTGGATCCGAATCGCTAGAAC<br>(BamHI underlined)                     |
| SadPa                 | TATCTCGAGTAACTTGCTTCGCCTGTAT<br>(XhoI underlined)                |
| N(31-328)a            | TATCTCGAGTTATTATTCTTTCTCAAGGGTAATCTC<br>(XhoI underlined)        |
| SadPLICs <sup>#</sup> | <u>GACGACGACAAGATGAGCAAGCAGAAAGTT</u>                            |
| SAPSeq1*              | AAGGTCATTCAGGAGTTG                                               |
| SAPSeq2               | CTGGGAAGGAACTTCTC                                                |
| SASSeq3               | TATTAACAACCTCAGCCAGTC                                            |
| SAPSeq4               | TTATGAGCAAGCAGAAAG                                               |
| SAPSeq5               | GAAAGTAACTTTTGATACAAGC                                           |
| SAPSeq6               | GAATCCAAAACCAGAGC                                                |
| T7 promoter primer    | TAATACGACTCACTATAGGG                                             |
| T7 terminator primer  | GCTAGTTATTGCTCAGCGG                                              |
| SRTA-5'-KO            | TTTTTT <u>CTGCAGCAAGAAGAAGCGTAAAGGTTC</u> (PstI<br>underlined)   |
| SRTA-3'-KO:           | TTTTTT <u>GAATTC</u> CAGTAGGTGTAAACATTGGTC<br>(EcoRI underlined) |
| SRTA-PROM             | TGCCTTGGTAGATGCTGCCG                                             |
| pSF151 MCS            | TTAGCTCACTCATTAGGCAC                                             |
| pSF151MCSa            | TCTGTGACTGGTGAGTACTT                                             |

---

<sup>#</sup>SadPLICs, primer, that contains 5'-arm (underlined) for LIC-cloning and anneals to nt 1-18 of SadP gene, was used for verification of SadP knockout

\*SAPSeq1-6, sequencing primers

**TABLE S3. Summary of the inhibitory values of Gal $\alpha$ 1–4Gal deoxy-derivatives obtained with recombinant SadP or whole bacteria.** The inhibitory values are presented as percent binding of SadP in the presence of inhibitor compared to the binding with buffer only. Previous IC<sub>50</sub> values (mM) using whole bacteria are shown for comparison.

| <b>Inhibitor</b>               | <b>% binding<sup>a</sup></b> | <b>MIC (mM) Haataja et al.<sup>b</sup></b> |
|--------------------------------|------------------------------|--------------------------------------------|
| Gal $\alpha$ 1–4Gal            | 5                            | 0.091                                      |
| Gal $\alpha$ 1–4Gal; 2-deoxy-  | 89                           | >2.5                                       |
| Gal $\alpha$ 1–4Gal; 3-deoxy-  | 93                           | >2.5                                       |
| Gal $\alpha$ 1–4Gal; 3-OMe-    | 124                          | >2.5                                       |
| Gal $\alpha$ 1–4Gal; 6-deoxy-  | 6                            | 0.082                                      |
| Gal $\alpha$ 1–4Gal; 2'-deoxy- | 7                            | 0.058                                      |
| Gal $\alpha$ 1–4Gal; 3'-deoxy- | 6                            | 0.033                                      |
| Gal $\alpha$ 1–4Gal; 3'-C-Me-  | 9                            | 0.30                                       |
| Gal $\alpha$ 1–4Gal; 4'-deoxy- | 115                          | >2.5                                       |
| Gal $\alpha$ 1–4Gal; 6'-deoxy- | 105                          | >2.5                                       |

<sup>a</sup>percent (%) binding to pigeon ovomucoid with 0.5 mM inhibitor as compared to binding with buffer only.

<sup>b</sup>minimum inhibitory concentrations (MIC, mM) for the inhibition of serotype 2 *S. suis* strain 628 binding to Gal $\alpha$ 1–4Gal $\beta$ 1–4Glc $\beta$ 1–O–CETE-BSA in solid-phase inhibition assay using [<sup>35</sup>S]-Methionine-labeled bacteria, Haataja, S., Tikkanen, K., Nilsson, U., Magnusson, G., Karlsson, K. A., and Finne, J. (1994) *J. Biol. Chem.* **269**, 27466-27472

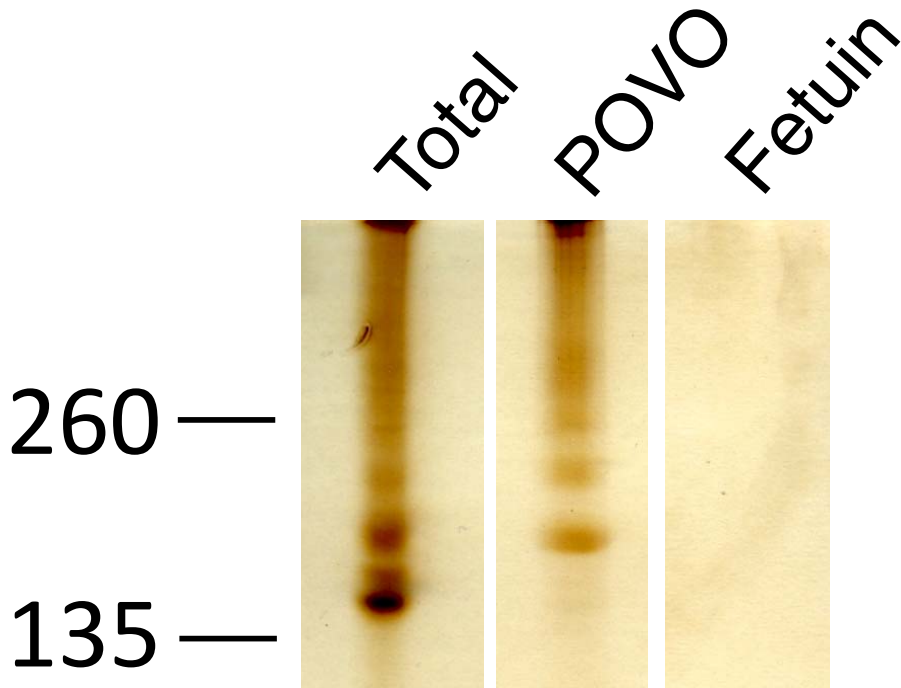

Supplemental Fig. 1. **Comparison of *S. suis* proteins binding to pigeon ovomucoid and fetuin.** Cell wall extracts of *S. suis* D282 (Total) were incubated with Affi-Gel 15 matrix coupled with pigeon ovomucoid (POVO) or fetuin and the bound proteins were eluted and analyzed with SDS-PAGE and silver staining.

Supplemental Fig. 2. **The primary amino acid sequence of SadP.** **A.** Sequences which are excluded in the SadP fusion protein, i.e. signal peptide and the C-terminal LPNTG motif are underlined. Three highly conserved repeats are highlighted with green, and N-terminal coiled coil region predicted with Coils program is highlighted with magenta. **B.** Prediction of seven tandem repeats each 57 aa long are shown.

**A.**

```

1      mskqkvvssl llstvvlggl afystttvka eslepdvtsv nasdatnkpvpneeggdf1
61     aeeeledddt leeelnekae evtepspspea llqprammsd setsgmeeip mndepsdnte
121    ekvekqqspl iqtsnadyks gkdqeklrts vsinllkaee ggiqkwkvtfd tsewsfnvkh
181    ggvyfilpng ldltkivdnn qhditasfpt dindyrnsqg ekyrffsskq gldnengfns
241    qwnwsagqan psetvnswws gnrlskiyfi nqitdttelt ylttakvtep nqgsfpllav
301    mksftytnsk stevtslgar eitlekektl ppkenpkpep eapkpdpapq psapesptee
361    pkkedapqtp qapstpekqp evpespnpet pdapstpkde pqapsipeek pqvpeepkqe
421    apsapstpek qpeapespte epkedapap stpekqpevp espnppetda pstpkdepqv
481    psipeeqpke tpapeepkke dtpqtpqaps tpkeeapkee vptppapsvp eeqpketp
541    evpkqedvqp eapksdkves dkqmpetkkp dmkqpkaddm pkeqkpkade pkaeqpmdk
601 pqmeapkkds eapksdkvet dkqlpetkqp dmkqpkaddm pkeqkpkade pkaeqpmdk
661 pqmeapkkds eapksdkvet dkpmpetkqp dmkqpkadkp eaekaqmpert egmkpeskas
721 mmpkaeapka tLPNTGeass aigwlggala tlatglylfnkkee

```

**B.**

| No. of Repeats | Total Score    | Length | Diagonal                                                                  | BW-From | BW-To | Level |
|----------------|----------------|--------|---------------------------------------------------------------------------|---------|-------|-------|
| 8              | 589.16         | 57     | 57                                                                        | 565     | 621   | 1     |
| 326-369        | (54.38/ 8.45)  |        | .....K.E..KTLPPKENPK.....PEPEA.....P.KPDAPOApSAPESPTEEPKKEDAPQT           |         |       |       |
| 370-419        | (50.21/ 7.16)  |        | FQAPSTPEKQPE.V..PESPNPETPDApstpkDEPQAPS.....I.FEEKPOVpEEPQO.....          |         |       |       |
| 420-468        | (65.66/11.94)  |        | .....EAPS.A..PSTP.EKQPEA.....PESPTEE.....PkKEDAPAP.STPEKQPEVPESPNPETP     |         |       |       |
| 471-523        | (71.75/13.82)  |        | PSTPKDEPQVPSiP..EEQPKE.TPAP.....EEPKKED.....t.P.Q.T.PQA.PSTPK.EAPK.EEVPT. |         |       |       |
| 524-561        | (61.37/10.61)  |        | .....PP.A..PSVPEEQ.PK.....ETPTPEV.....P.KQEDVO....P....EAPKSDKVESD        |         |       |       |
| 565-621        | (116.43/27.62) |        | PETKKPDMKQPK.A..DDMPKEQKPKA.....DEPKAEQ.....P.QMDKPQm.EAPKSDSEAPKSDKVETD  |         |       |       |
| 625-681        | (116.80/27.73) |        | PETKQPDMDKQPK.A..DDMPKEQKPKA.....DEPKAEQ.....P.QMDKPQm.EAPKSDSEAPKSDKVETD |         |       |       |
| 685-733        | (52.56/ 7.89)  |        | PETKQPDMDKQPK.AdKPEAEKAQMPRT....EGMKPESkasmmP.KAEAPKA.TLP.....            |         |       |       |

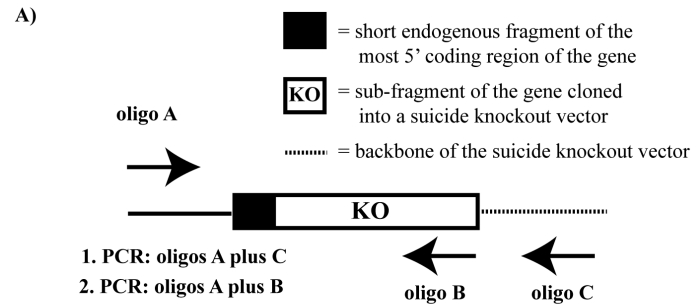

Supplemental Fig. 3. **PCR-based verification of the generated knockouts.** **A.** Principle of the PCR-based approach to verify insertion of the knockout plasmid into a correct gene at a correct genetic locus. This approach is based on running two independent PCR reactions. Oligos A and B amplify a fragment with wild-type and knockout whereas oligos A and C amplify only a fragment with the knockout due to insertion of the suicide vector into the correct genetic locus. **B.** Four independent *SadP*-knockouts were isolated in the D282 background and are here analyzed for vector insertion into the *sadP* (oligo A: *SadPLICs*; oligo B: *SadP-KOa*; oligo C: *pSF151-MCS*). **C.** Two independent *SadP*-knockouts were isolated in the P1/7 background and are here analyzed for vector insertion into the *sadP* (oligo A: *SadPLICs*; oligo B: *SadP-KOa*; oligo C: *pSF151-MCS*). **D.** One *SrtA*-knockout was isolated in the D282 background and is analyzed for vector insertion into the *srtA* (oligo A: *SRTA-PROM*; oligo B: *SRTA-3'-KO*; oligo C: *pSF151-MCS*). **E.** Schematic representation of the *srtA*-containing genomic region in *S. suis* NCTC10234 (nucleotide accession code AB066353) Osaki, M., Takamatsu, D., Shimoji, Y., and Sekizaki, T. (2002) *J. Bacteriol.* **184**, 971-982

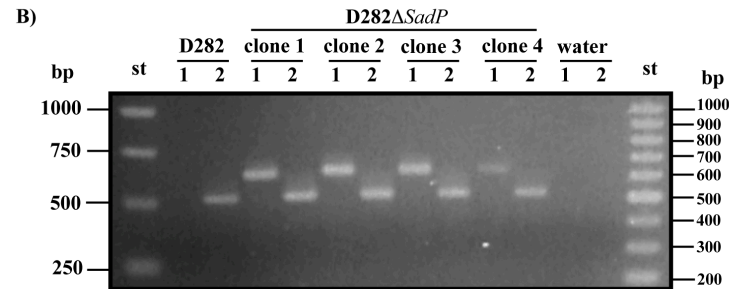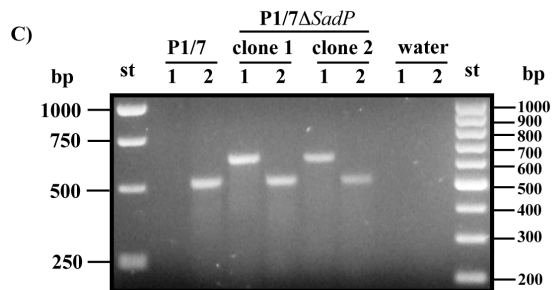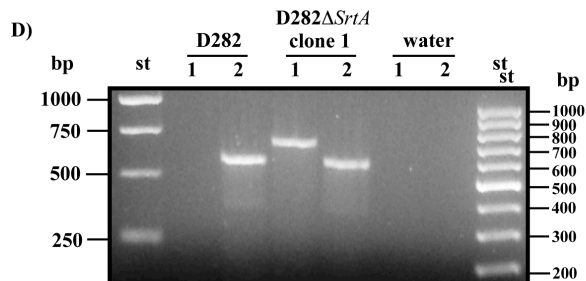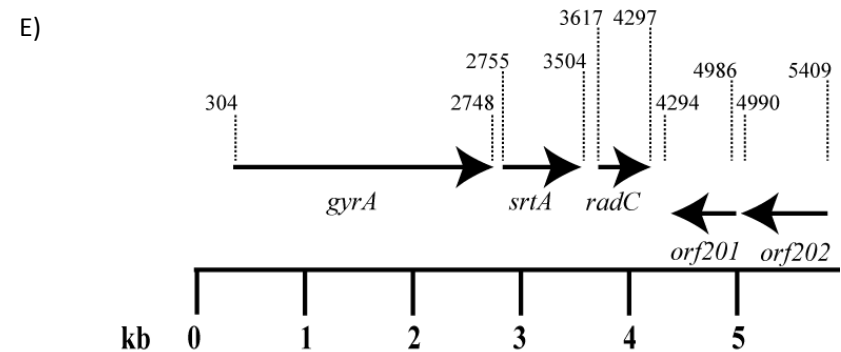

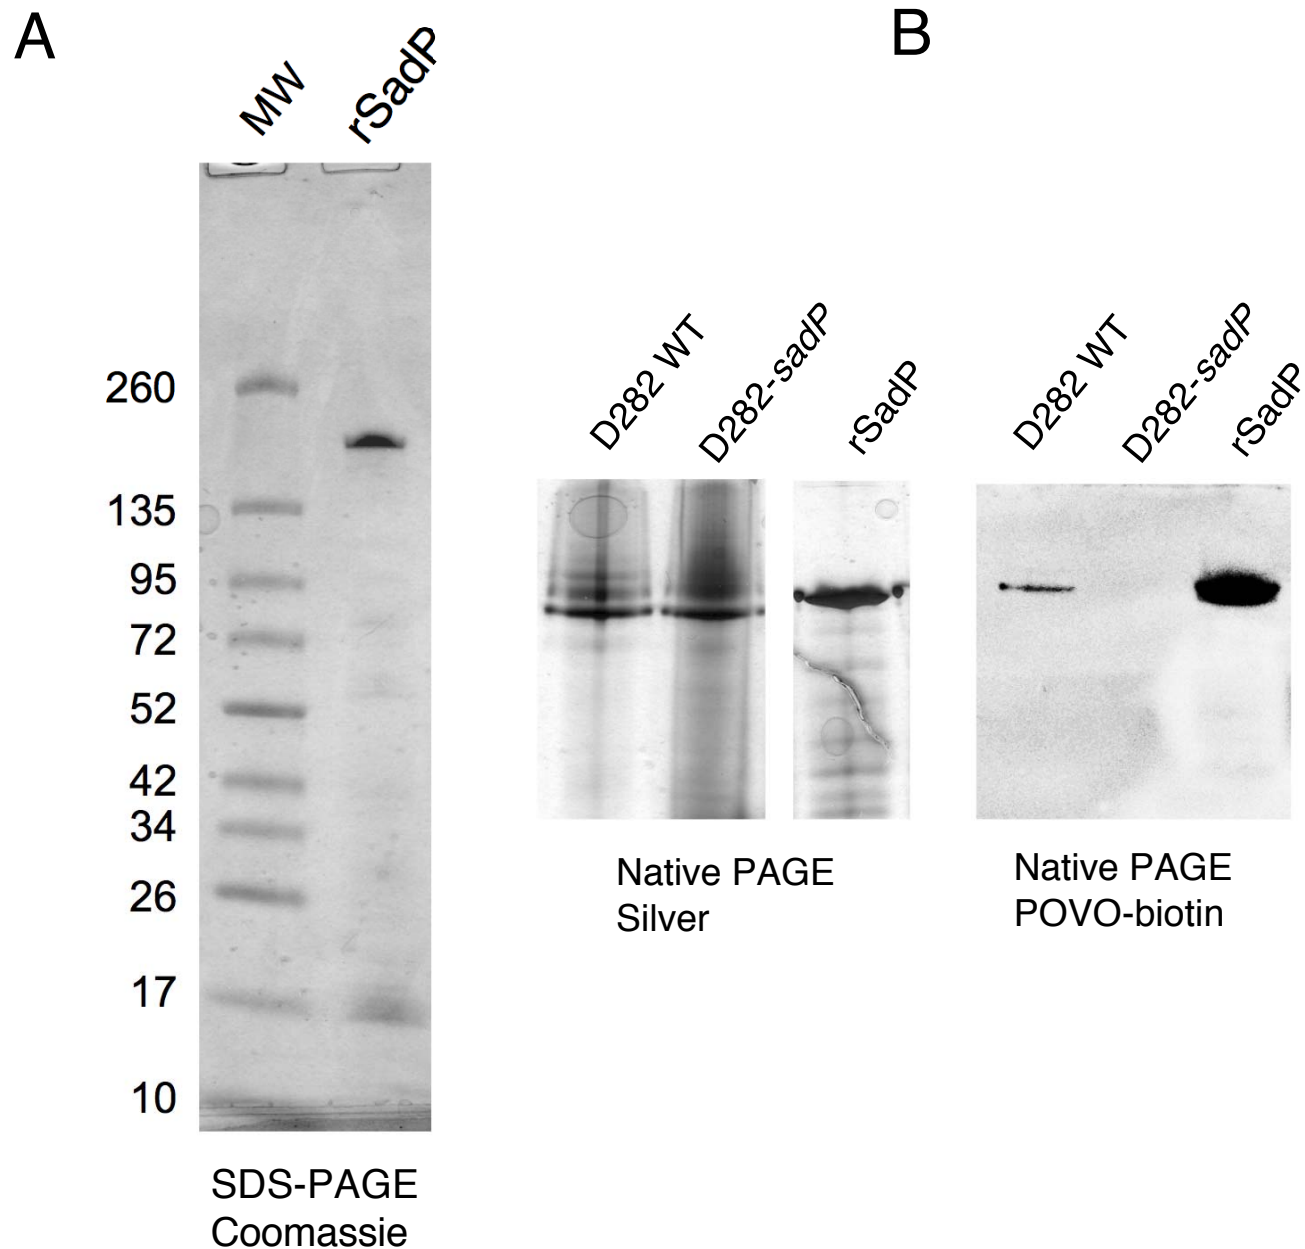

Supplemental Fig. 4. **SDS-PAGE and non-denaturing native PAGE of recombinant and native SadP.** **A.** Coomassie-stained SDS-PAGE of the recombinant SadP cloned in pET28a expression vector and expressed in *E. coli*. **B.** Pigeon ovomucoid binding to lysozyme extract of wild-type D282, D282-*sadP* mutant and recombinant SadP. **The** lysozyme extracts of the bacteria and recombinant SadP (2  $\mu$ g) were separated in native PAGE and the gel was stained with silver staining. A replica was blotted onto nitrocellulose membrane and probed with biotinylated pigeon ovomucoid.

Supplemental Fig. 5. **Clustal W alignment of proteins with homology to *S. suis* SadP.** The alignment shows the homology of SadP with the streptococcal proteins listed below. The conserved prolines of the tandem repeat region are marked with asterisks. There is no significant homology to SadP N-terminal sequence. Proteins included in the Clustal W comparison: gi|253753057 *S. suis* P1/7 surface protein (SadP); gi|56407146 and gi|56407144 *S. agalactiae* C protein immunoglobulin-A-binding beta antigen; gi|292557646, surface protein of *S. suis*; gi|19548143, *S. pneumoniae* PspC; gi|149013436, *S. pneumoniae* IgA-binding beta antigen.

```

gi|253753057      ----MSKQKVVSSLLSTWVLGGLAFYSTTTVKAESLEPDVTSVNASDATNKPVVPNEEGG
gi|56407146      -----
gi|56407144      -----
gi|292557646     MVEMETANKKFRYSIRKFKVGVGSVLLATCLLGAGVSTP----TAFAMIDSSPA----TE
gi|19548143      -MFASKNERKVHYSIRKFSIGVASVAVASLFGMSVVHATEKEVTTQVATSSNKANKSQTE
gi|149013436     -----

gi|253753057     DFLAEEELDDDTLEEELNEKAEVTEPSSPEALLQPRAMMSDSETSGMEEIPMNDEPSD
gi|56407146     -----
gi|56407144     -----
gi|292557646     D--TEVKKTPLQLKELVEELKMD-----LAEL----EKLE
gi|19548143     H--MKAARKQVDEYIEKMLSEIQLDRRKHTQNVGLLTKLGAIKTEYLRLGLSVS----KEK-
gi|149013436     -----MYKLDES----TQKA

gi|253753057     NTEEKVEKQQSPLIQTSNADYKSGKDQEKLRTSVSVINLLKAEEGQIQ----WKVTFDTSE
gi|56407146     -----
gi|56407144     -----
gi|292557646     KYEK SAYPIQDYL-WKEFSDFG-----TKEMARVSSSLKEEDSQI-----
gi|19548143     STAELPSEIKEKL-TAAFEQFKKDT----LKSGKKVA-----EAQKKAQDQKE
gi|149013436     QLQELVTESQSKL-DEAFSKFKNGL----SSSSSSGSSTKPETPQPEKPEHQKPTTPAPD

gi|253753057     WSFNVKHGGVYFILPNGLDLTKIVDNQHDITASFPTDINDYRNSGQEKYRFFSSKQGLD
gi|56407146     -----
gi|56407144     -----
gi|292557646     --PNIDPLVDF--GN-----HIKWERLTRQVAQYRKKYPDN-----
gi|19548143     AKQEIEALIVK---HKGRE----IDLDRKKAKAAVTEHLKLLNDIE-----KN-LK
gi|149013436     TKPSPQPEGKK---PSVPD----INQEKEKAKLAVATYMSKILDDIQ-----KHLHQ

gi|253753057     NENGFNSQWNWSAGQANPSETVNSWKSGNRLSKIYFINQI----TDTTELTYTLTAKVTE
gi|56407146     -----AIKQQTIFDIDNAKTEVEIDNLVHD
gi|56407144     -----AIKQQTIFDIDNAKTEVEIDNLVHD
gi|292557646     -----K-----EIEEEYKQHLEQTNGKNYGSQEAALNLQA
gi|19548143     KEQH-----THTVELIK-----NLKDIEKTYLHKLDESTQKAQLQKLI AE
gi|149013436     KEKH-----RQIVALIK-----ELDELKKQALSEIDNVNTKVEIENTVHK

gi|253753057     PNQQSFPLLAMVMSFTYTNKSKTEVTSLGAREITLEKEKTLPPKENPKP----EPEAPK-
gi|56407146     AFSKMNAVAKFQKGLTNTPETPDT-----KIPQLPQAPDTPQ----APDTPHV
gi|56407144     AFSKMNAVAKFQKGLTNTPETPDT-----KIPQLPQAPDTPQ----APDTPHV
gi|292557646     SVNEAEQAFEKIKE-----IVKKLEPKA-----EEPAPV-
gi|19548143     SQSKLDEAFSKFKN-----GLSSSS-NSGSSTKPETPQ-
gi|149013436     IFADMDAVVTKFKK-----GLTQDTPKEPGNKKPSAPK-
                                                *

gi|253753057     PDA---PQAPSAPESPTTEPK-----KEDAPQTPQAPSTPEKQPEVPESPN-PETPDAP
gi|56407146     PES---PKAPEAPRVP-ESPK-----TPDTPHVPESPK APEA-PRVPESPKTPDTPHVP
gi|56407144     PES---PKAPEAPRVP-ESPK-----TPDTPHVPESPK APEA-PRVPESPKTPDTPHVP
gi|292557646     PEA-PTPKEEPAPAPETPTPKEDAPKAEAEAPKTEEKAP-ESKEETPKDTEAPKDEKEV
gi|19548143     P---ETPKPEVKPELETPKPE---L---ETPKPEVKPELETPKPEVKPEPETPKPEVKP
gi|149013436     PGMQPSQPEVKPQLEKPKPE---VKPQPEKPKPEVKPQLEKPKPEVKPQPEKPKPEVKP
*   *   *   *   *   *

gi|253753057     STPKDEPQAPSIPEEKPVPEEPKQEAAPSAPSTPEKQPEAPESPTTEPKKEDAPAPSTPE
gi|56407146     ESPK-APEAPRVPES-PKTPDTPH--VPESPKAPEAPRVPESPKTPEAPHVP-ESPKTPE
gi|56407144     ESPK-APEAPRVPES-PKTPPEAPH--VPESPKTPEAPRVPESPKTPDTPHVP-ESPKAPE
gi|292557646     PAPTIPDTPKEEEG-PKP-MEPEADKPTPPA-PDAEPIPEAPKAE----EDTPAPKVEE
gi|19548143     ELETPKPEVKPEPET-PKPEVKPE---PETPK-PEVKPELETPKPEVKPEPETPKPEVKP
gi|149013436     QLEKPKPEVKPQLEK-PKPEVKPQ---PEKPK-PEVKPQPEKPKPEVKPQPEKPKPEVKP
*   *   *   *   *   *

gi|253753057     KQ---PEVPESPNPETPDAPSTPKDEPQVPSIPEEQPKETPAPEEPKEDTPQTPQAPST-
gi|56407146     A-----PKTPDTPHVPESPK APEAPRVPESPKT-PDTPHVPESPK APEAPRVPESPKT-
gi|56407144     APRVPESPKTPDTPHVPESPK APEAPRVPESPKT-PEAPHVPESPKTPPEAPK IPEPKT-
gi|292557646     ET---QAPKTEEKAPESKEETPKDTEAPKDEKEVPAPTIPDTPKKEEGPKMPEEAD-
gi|19548143     EL---ETPKPELETPKPELETPKPEVK-PELETPKPEVKPEPETPKPEVKPELETPKPEV
gi|149013436     QL---EKPKPEV---KPQPEKPKPEVK-PQLEKPKPEVKPQLEKPKPEVKPQPEKPKPEVK
*   *   *   **   *

```



gi|253753057  
gi|56407146  
gi|56407144  
gi|292557646  
gi|19548143  
gi|149013436

TKKQDMKQPKADDMPKEQ-KPKADEPKAEQPMQDKPQMEAPKKDSEAPKSDKV-----ET  
STDGNTKVTVVFDPKPTDADKLHLKEVTTKELA-----  
STDGNTKVTVVFDPKPTDADKLHLKEVTTKELA-----  
APKDEKEVPAPTPIP--DTPKEEGPKMEPEADKPTPEAPKAEAAAAPAPTPMPEAPKEE  
TPKPELETPKPEVKPELEIPKPEVKPDNSKPQADKKPSTPN-----NLSKDK  
KPKP-----DNSKPQADKKPSTTN-----NLSKDK

gi|253753057  
gi|56407146  
gi|56407144  
gi|292557646  
gi|19548143  
gi|149013436

DKQLPETKQPMKQPKADDMPKEQKPKADEPKAEQPMQDKPQ-----ME  
-----  
-----  
EVPAPTPAPETPMDEPKMDEPKAEMPAPAPKAEVPTPAPMP--APETPKSEEAAPAPTP  
QSSNQASTNENKKGPAATNPKKSLPSTGSIISNLALEIAGLLTLAGATILAKKRMK----  
QPSNQASTNEK-----ATNPKKSLPSTGSIISNLALEIAGLLTLAGATILAKKRMK----

gi|253753057  
gi|56407146  
gi|56407144  
gi|292557646  
gi|19548143  
gi|149013436

APKQDSEAPKSDKVETDKPMP----ETKQDMKQPKAD---KPEAEKAQMPRTGKMPES  
-----  
-----  
MPEADKPTPEAPKAEETPAPTPMLEDKQPEMEQPKAEDMPKEEMPKEAEQPKAEDSTPKT  
-----  
-----

gi|253753057  
gi|56407146  
gi|56407144  
gi|292557646  
gi|19548143  
gi|149013436

-----KASMPKAE-----  
-----  
-----  
AVPEVAPKTAEKPKLDFTTKERKVEEALPIKEEIRYDASLALGKSYLLQEGKAGKVSVY  
-----  
-----

gi|253753057  
gi|56407146  
gi|56407144  
gi|292557646  
gi|19548143  
gi|149013436

-----AP  
-----  
-----  
QDVIVDGKVVATNLLSETVVEGQNRILVKGSLMKKEEVKTPSVQSNPTLSHGAPSAN  
-----  
-----

gi|253753057  
gi|56407146  
gi|56407144  
gi|292557646  
gi|19548143  
gi|149013436

KATLPNTGEASSAIGWLG-GALATLATGLYLFKNKKEE---  
-----  
-----  
KATLPATGEQRNNLALVGLGLAGISLTVVATAINKKSKDQI  
-----  
-----
